# Supplementary material
Source: publisher figshare collection journal article supplement (https://acs.figshare.com/ndownloader/files/10029532)
Supplement: Supplementary file 1 [file 10029532]

## **Reactive Intermediates Involved in Cobalt Corrole Catalyzed Water Oxidation (and Oxygen Reduction)**

Woormileela Sinha,<sup>†</sup> Amir Mizrahi,<sup>‡,†</sup> Atif Mahammed,<sup>†</sup> Boris Tumanskii<sup>†</sup> and Zeev Gross<sup>\*,†</sup>

<sup>†</sup>Schulich Faculty of Chemistry, Technion-Israel Institute of Technology, Haifa 32000, Israel

<sup>‡</sup>Chemistry Department, Nuclear Research Centre Negev, Beer-Sheva, Israel

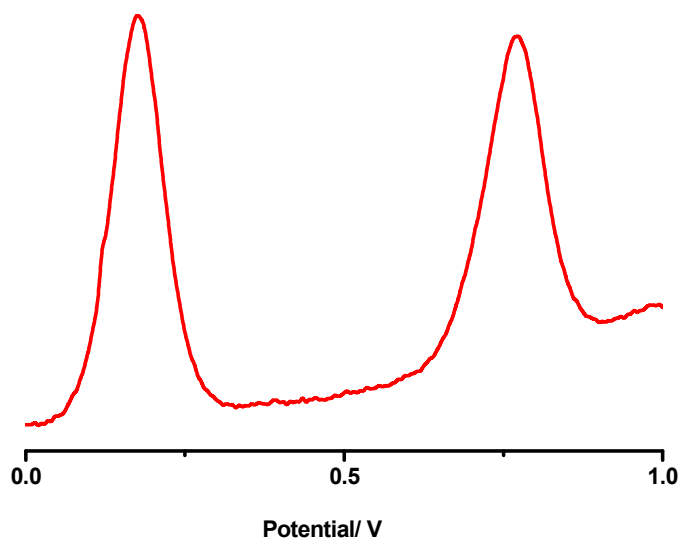

**Figure S1** Square wave voltammogram of 0.5 mM Co(tpfc) in 0.2 M TBAP solution of acetonitrile, under Ar atmosphere at a scan rate of 250 mV/ sec. Working electrode: Glassy carbon, Reference electrode: Ag/AgCl, Counter electrode: Platinum wire; TBAP as the supporting electrolyte (0.2 M). The potentials are versus ferrocene/ ferrocenium.

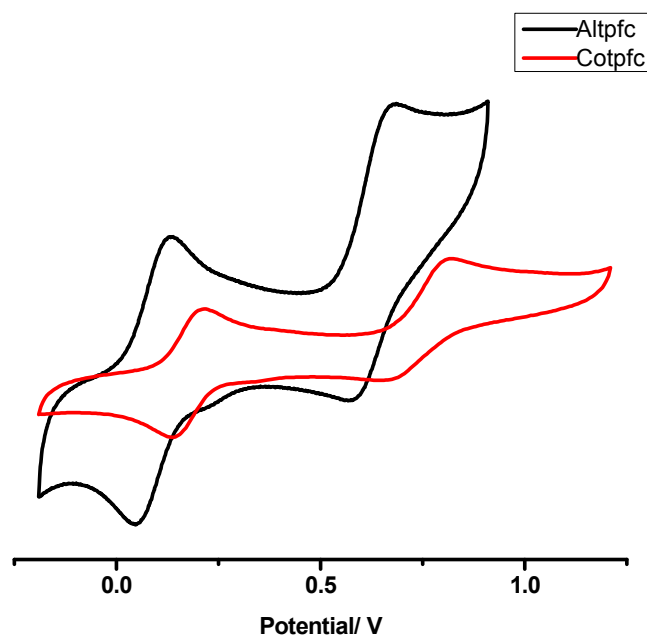

**Figure S2** Cyclic voltammograms of 0.5 mM Co(tpfc) (—) and Al(tpfc) (—) in acetonitrile solutions under Ar atmosphere at a scan rate of 0.1 V/s and other conditions as in Figure S1.

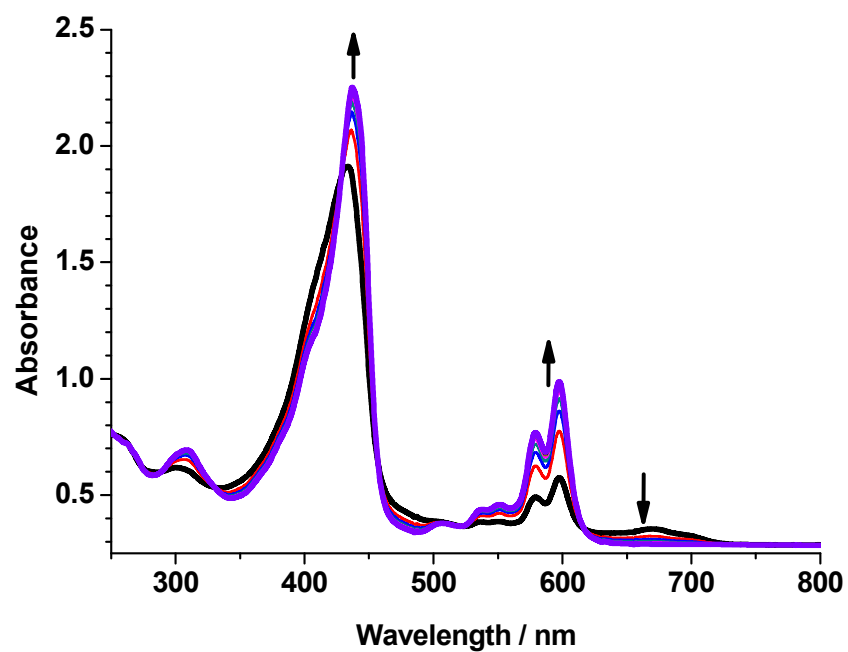

**Figure S3** Spectroelectrochemical measurements during reduction of the solution of 0.5 mM Co(tpfc) oxidized at 0.51 V, in 0.2 M TBAP solution of acetonitrile, under argon atmosphere at an applied potential of -0.19 V (vs. Fc/Fc<sup>+</sup>).

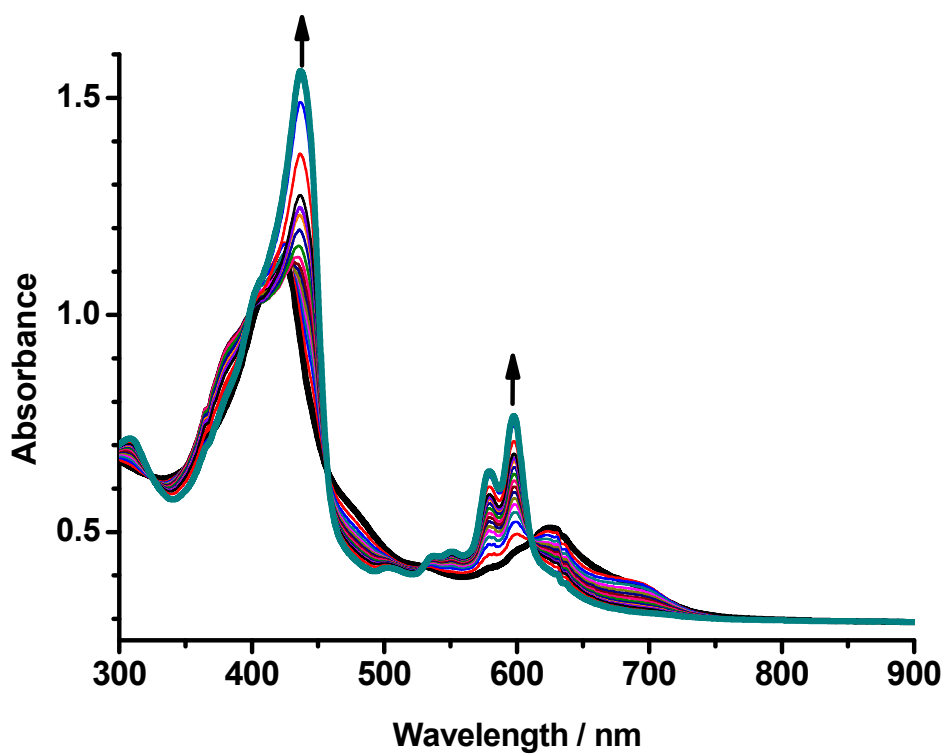

**Figure S4** Spectroelectrochemical measurements during reduction of the solution of 0.5 mM Co(tpfc) oxidized at 1.11 V, in 0.2 M TBAP solution of acetonitrile under argon atmosphere without any application of potential (vs. Fc/Fc<sup>+</sup>).

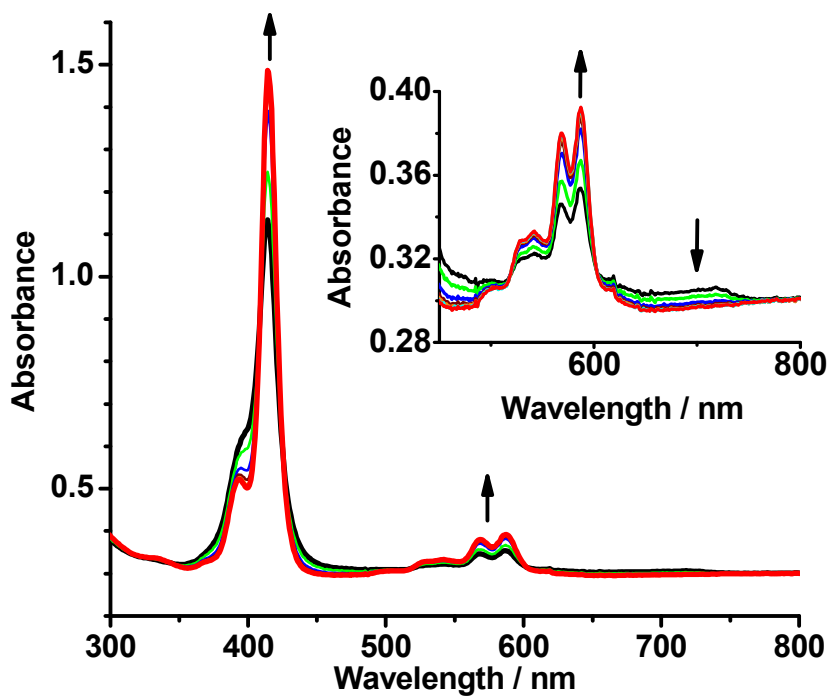

**Figure S5** Spectroelectrochemical measurements during reduction of the solution of 0.05 mM Al(tpfc) oxidized at 0.41 V in 0.2 M TBAP solution of acetonitrile, under argon atmosphere at an applied potential of -0.19 V (vs. Fc/Fc<sup>+</sup>).

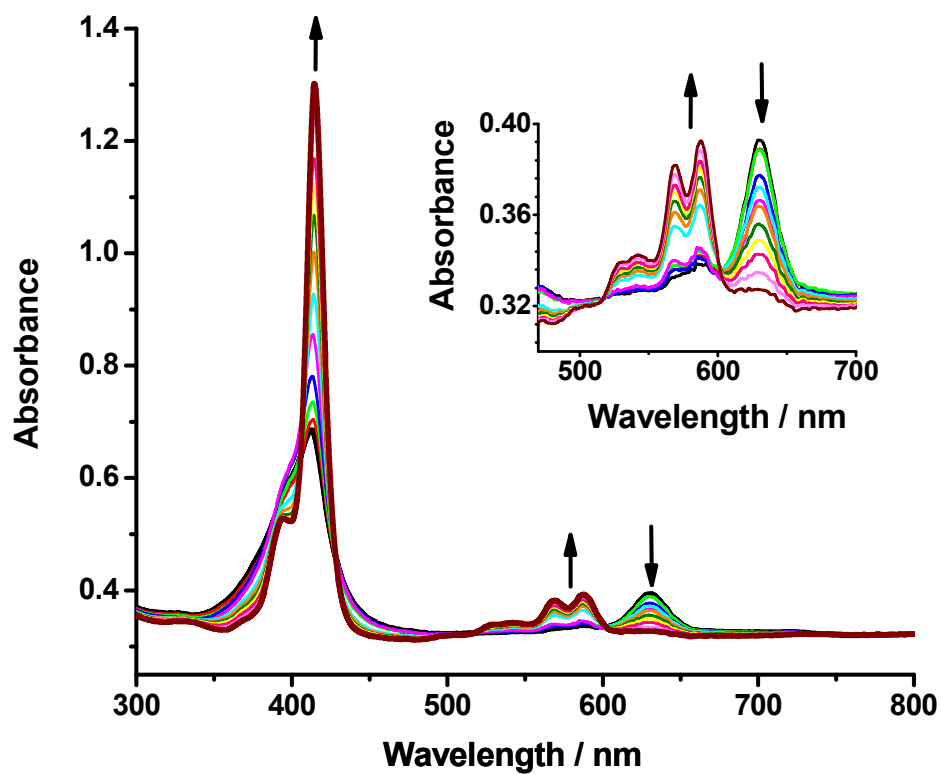

**Figure S6** Spectroelectrochemical measurements during reduction of the solution of 0.05 mM Al(tpfc) oxidized at 0.91 V in 0.2 M TBAP solution of acetonitrile, under argon atmosphere at an applied potential of -0.19 V (vs. Fc/Fc<sup>+</sup>).

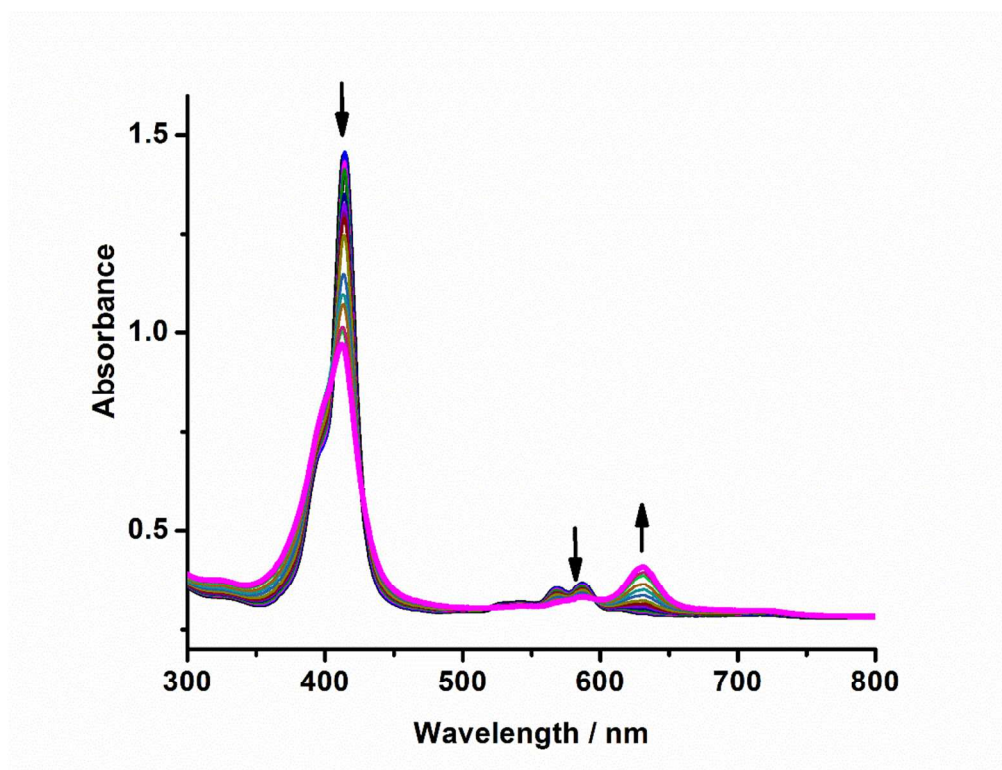

**Figure S7** Spectroelectrochemical measurement of 0.05 mM Al(tpfc), starting after the first oxidation performed at 0.41 V (300 sec), and changing the potential to 0.91 V (350 sec). All values are vs. Fc/Fc<sup>+</sup> in 0.2 M TBAP solutions of acetonitrile, under argon atmosphere.

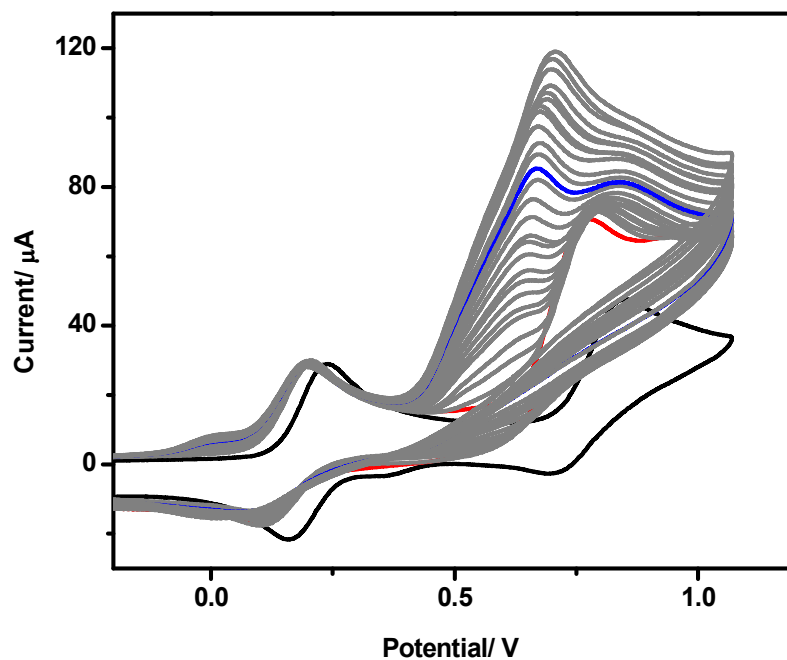

**Figure S8** Cyclic voltammograms of 1 mM Co(tpfc) in acetonitrile solutions (—), 4.8% water (v/v) (—) & increasing concentration of TBAOH (15.0 - 310.0 μM) at a scan rate of 0.1 V/s under the conditions as in Figure S1. Results obtained with 0 μM and 196 μM TBAOH are emphasized by red and blue colors respectively.

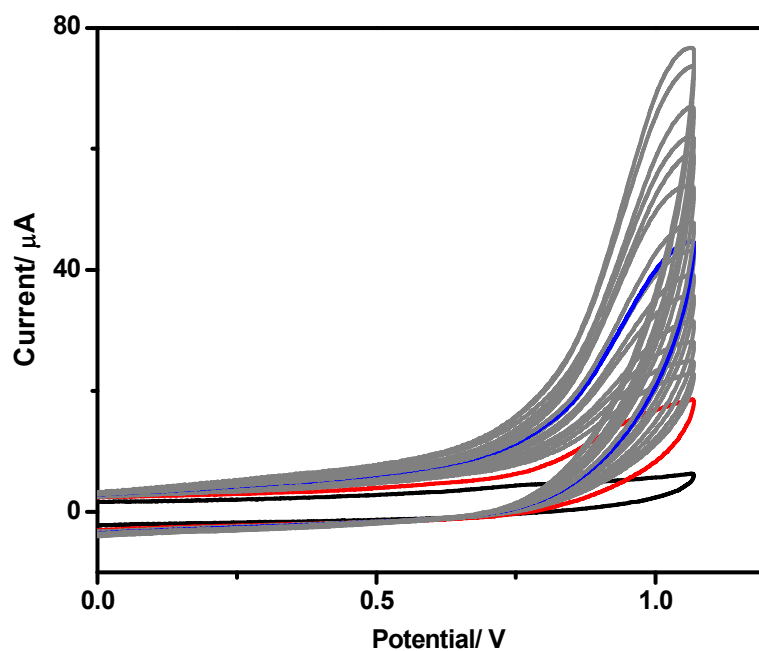

**Figure S9** Cyclic voltammograms in acetonitrile solutions (—), 4.8% water (v/v) (—) & increasing concentration of TBAOH (15.0 - 310.0  $\mu\text{M}$ ) at a scan rate of 0.1 V/s under the conditions as in Figure S1. Results obtained with 0  $\mu\text{M}$  and 196  $\mu\text{M}$  TBAOH are emphasized by red and blue colors respectively.



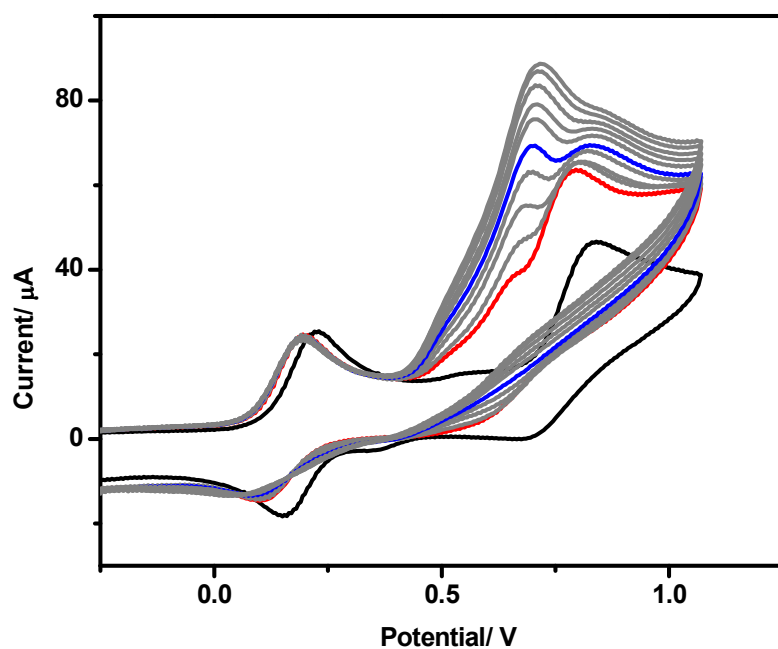

**Figure S10** Cyclic voltammograms of 1 mM Co(tpfc) in acetonitrile solutions (—), 4.8% water (v/v) (—) & increasing concentration of TBAF (15.0 - 124.0 μM) at a scan rate of 0.1 V/s under the conditions as in Figure S1. Results obtained with 0 μM and 58 μM TBAF are emphasized by red and blue colors respectively.

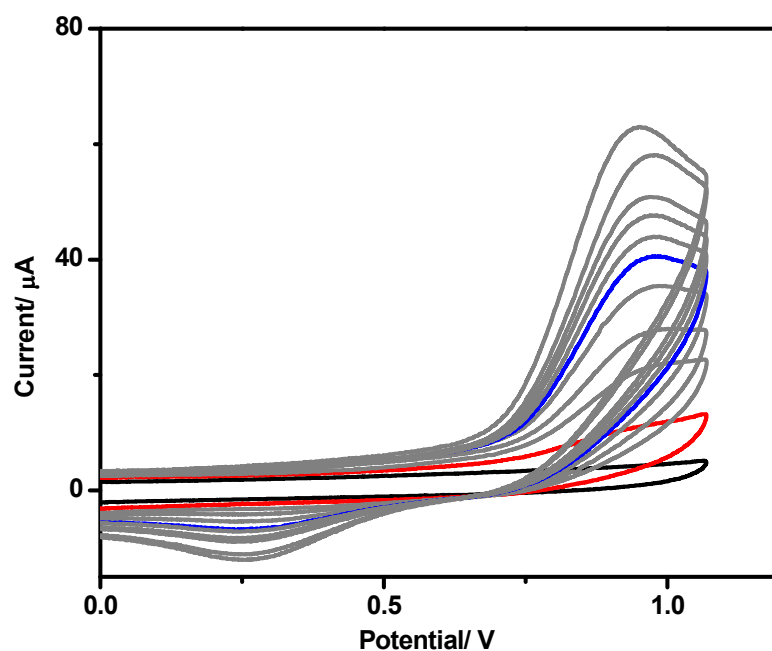

**Figure S11** Cyclic voltammograms in acetonitrile solutions (—), 4.8% water (v/v) (—) & increasing concentration of tetrabutyl ammonium fluoride (TBAF) (15.0 - 124.0  $\mu\text{M}$ ) at a scan rate of 0.1 V/s under the conditions as in Figure S1. Results obtained with 0  $\mu\text{M}$  and 58  $\mu\text{M}$  TBAF are emphasized by red and blue colors respectively.

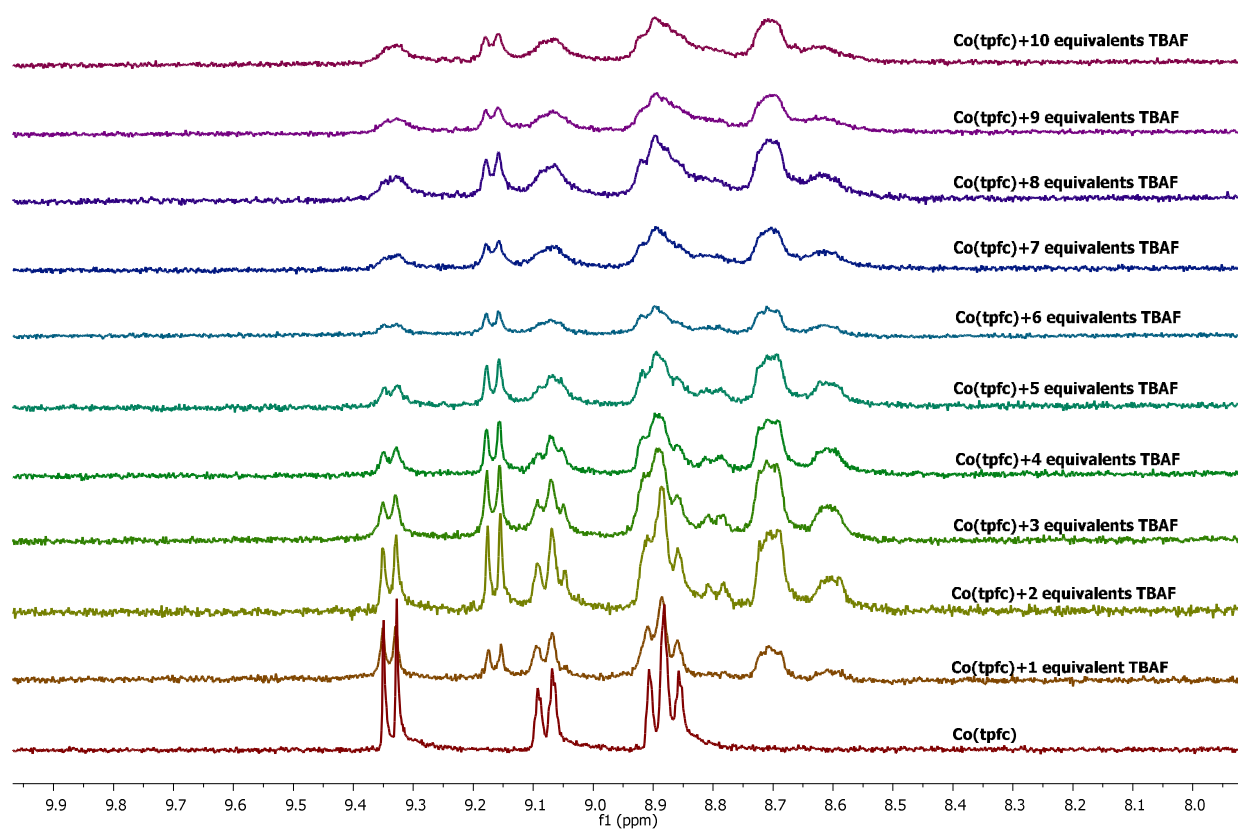

**Figure S12**  $^1\text{H}$  NMR spectral changes of  $\text{Co}(\text{tpfc})$  in the aromatic region on increasing the concentration of TBAF in  $\text{CD}_3\text{CN}$  at room temperature (200 MHz).

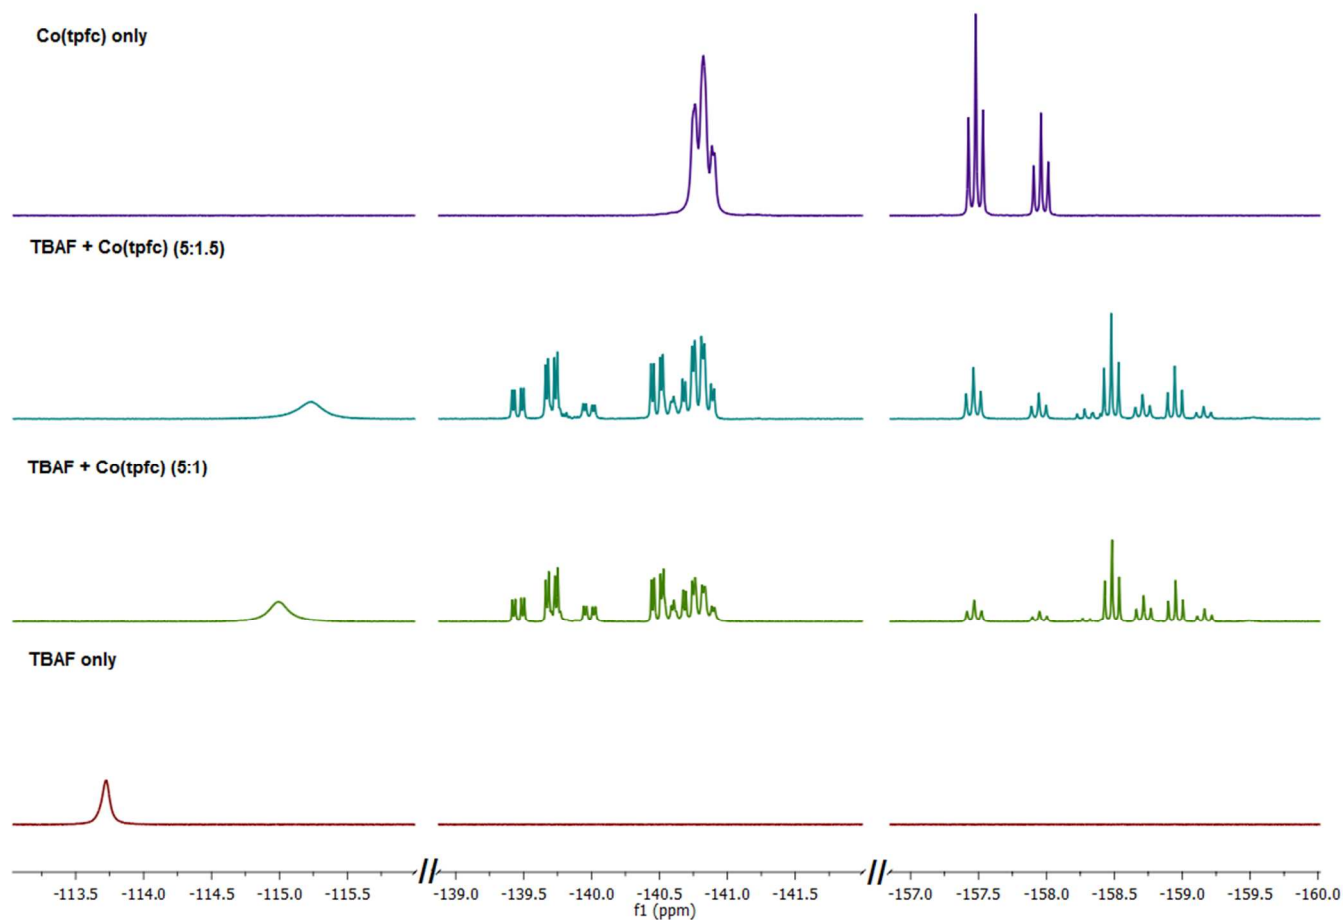

**Figure S13** The  $^{19}\text{F}$  NMR (376.75 MHz) spectral changes on adding increasing amounts of Co(tpfc) to a solution of TBAF in  $\text{CD}_3\text{CN}$ .

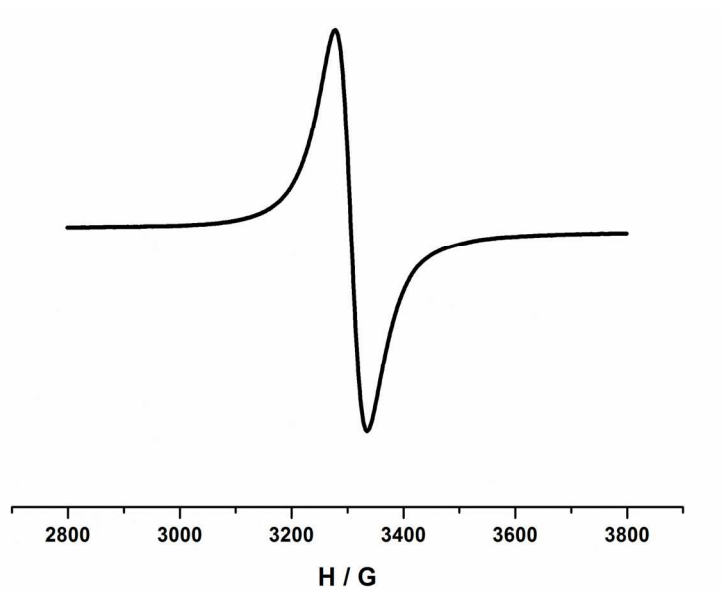

**Figure S14** EPR spectrum of Co(tpfc) (precipitated from hexane) by addition of bromine (filtered and inserted into a capillary) and measured as such.
